# Supplementary material
Source: Springer Nature journal article supplement (https://www.springermedizin.de/resource/supplementary/13012_2008_138_MOESM8_ESM.pdf/9629442)

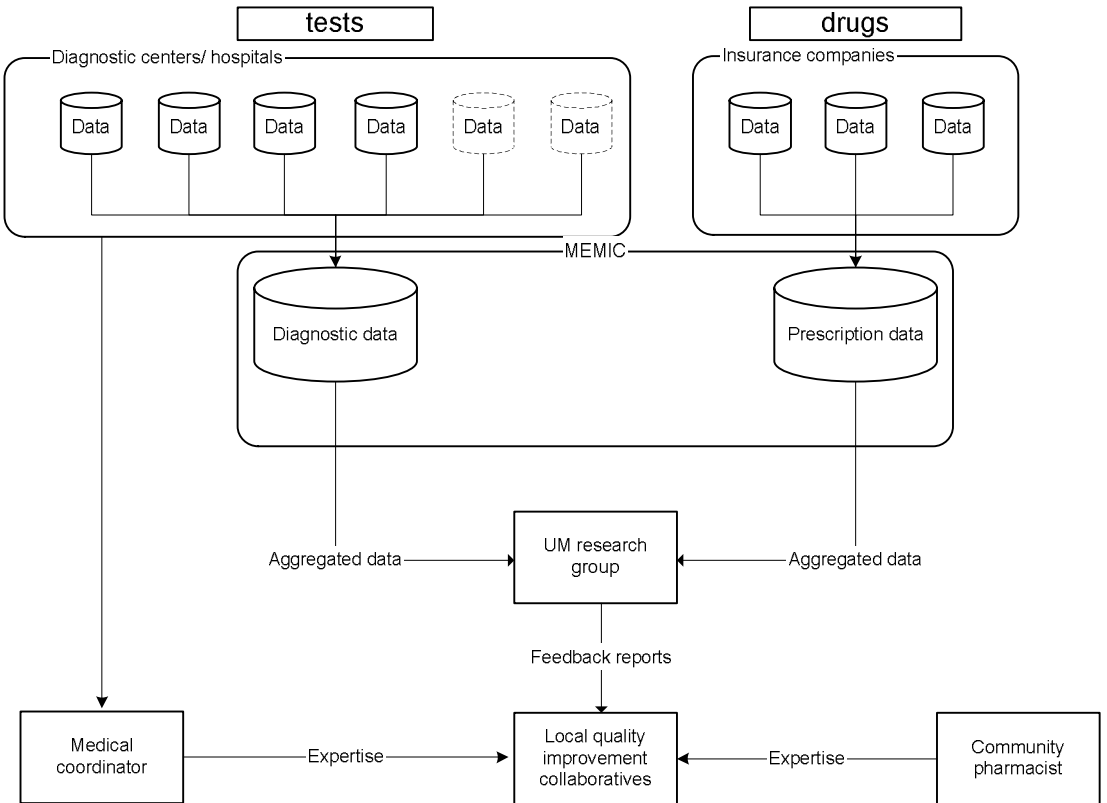

Supplement: MOESM8 [file 9629442]
